# Supplementary material for: Improving Membrane Activity and Cargo Delivery Efficacy of a Cell-Penetrating Peptide by Loading with Carboranes
Source: MDPI journal article supplement (doi:10.3390/pharmaceutics13122075), 2021-12-03
Supplement: s1 [file s1]

# Supplementary Materials: Improving Membrane Activity and Cargo Delivery Efficacy of a Cell-Penetrating Peptide by Loading with Carboranes

Tamara Lützenburg, Nele Burdina, Matthias S. Scholz and Ines Neundorff

**Table S1.** Names, sequences, analytical data and critical micelle concentration (CMC) of the CB-sC18 series, the CF-labeled CB-sC18 series and the CB-pVEC series. Peptides are C-terminally amidated. K: lysine with CB attached at the  $\epsilon$ -amino group. K: labeling position for CF.

| Peptide                  | Sequence                                             | MW <sub>calc.</sub><br>[Da] | MW <sub>exp.</sub><br>[Da] | Purity<br>[%] | CMC<br>[ $\mu$ M] |
|--------------------------|------------------------------------------------------|-----------------------------|----------------------------|---------------|-------------------|
| sC18                     | <sup>1</sup> GLRKRLRKFRNKIKEK <sup>16</sup>          | 2069.55                     | 2070.34                    | >99           | -                 |
| CB <sub>1</sub> -sC18    | K-GLRKRLRKFRNKIKEK                                   | 2367.95                     | 2368.74                    | >99           | n.d.              |
| CB <sub>2</sub> -sC18    | KK-GLRKRLRKFRNKIKEK                                  | 2666.37                     | 2666.97                    | >95           | n.d.              |
| CB <sub>3</sub> -sC18    | KKK-GLRKRLRKFRNKIKEK                                 | 2965.79                     | 2965.99                    | >97           | 44.46 $\pm$ 1.14  |
| CB <sub>4</sub> -sC18    | KKKK-GLRKRLRKFRNKIKEK                                | 3264.21                     | 3263.82                    | >98           | 43.45 $\pm$ 1.15  |
| CB <sub>5</sub> -sC18    | CB-KKKK-GLRKRLRKFRNKIKEK                             | 3433.44                     | 3434.29                    | >96           | 44.37 $\pm$ 1.16  |
| CF-sC18                  | <sup>1</sup> GLRKRLRKFRN <i>K</i> IKEK <sup>16</sup> | 2427.87                     | 2429.06                    | >99           | n.d.              |
| CB <sub>1</sub> -CF-sC18 | K-GLRKRLRKFRN <i>K</i> IKEK                          | 2726.27                     | 2727.47                    | >99           | n.d.              |
| CB <sub>2</sub> -CF-sC18 | KK-GLRKRLRKFRN <i>K</i> IKEK                         | 3024.68                     | 3025.79                    | >95           | n.d.              |
| CB <sub>3</sub> -CF-sC18 | KKK-GLRKRLRKFRN <i>K</i> IKEK                        | 3323.08                     | 3324.37                    | >96           | n.d.              |
| CB <sub>4</sub> -CF-sC18 | KKKK-GLRKRLRKFRNKIKEK                                | 3621.48                     | 3623.16                    | >98           | n.d.              |
| CB <sub>5</sub> -CF-sC18 | CB-KKKK-GLRKRLRKFRNKIKEK                             | 3791.71                     | 3793.26                    | >97           | n.d.              |
| pVEC                     | <sup>1</sup> LLILRRRIRKQAHAAHSK <sup>18</sup>        | 2209.70                     | 2208.92                    | >97           | n.d.              |
| CB <sub>1</sub> -pVEC    | K-LLILRRRIRKQAHAAHSK                                 | 2507.11                     | 2506.63                    | >99           | n.d.              |
| CB <sub>2</sub> -pVEC    | KK-LLILRRRIRKQAHAAHSK                                | 2805.51                     | 2805.78                    | >99           | n.d.              |
| CB <sub>3</sub> -pVEC    | KKK-LLILRRRIRKQAHAAHSK                               | 3103.91                     | 3105.91                    | >98           | n.d.              |
| CB <sub>4</sub> -pVEC    | KKKK-LLILRRRIRKQAHAAHSK                              | 3402.31                     | 3402.37                    | >99           | n.d.              |
| CB <sub>5</sub> -pVEC    | CB-KKKK-LLILRRRIRKQAHAAHSK                           | 3572.54                     | 3572.44                    | >97           | n.d.              |

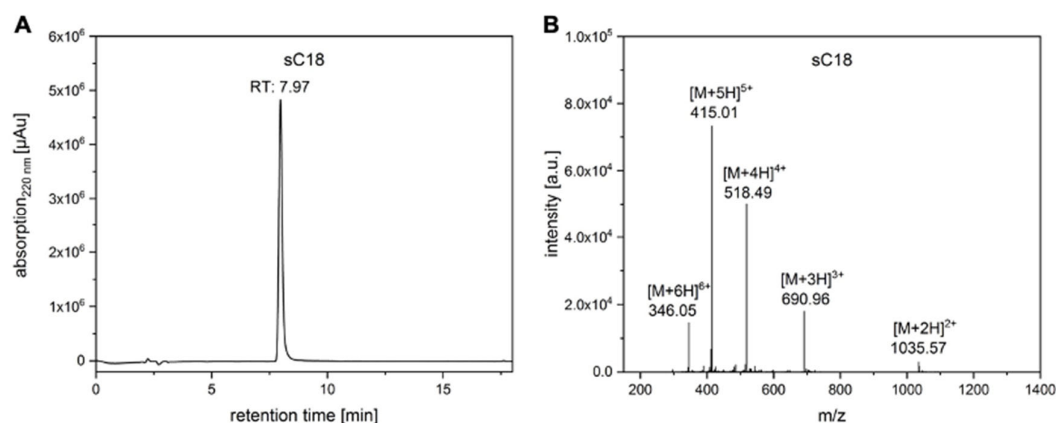

**Figure S1.** (A) UV-chromatogram and (B) corresponding ESI-MS spectrum of sC18 after purification. UV-chromatogram was recorded using a linear gradient from 10–60% ACN in water (incl. 0.1% TFA) over 15 min.

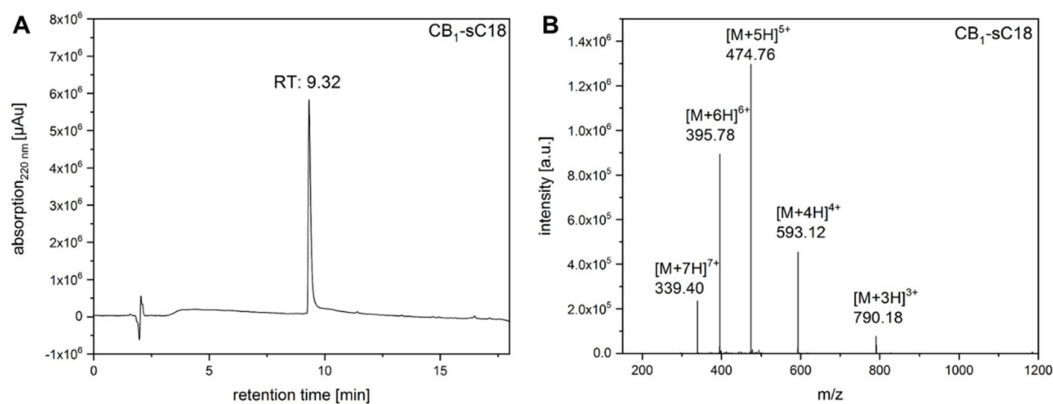

**Figure S2.** (A) UV-chromatogram and (B) corresponding ESI-MS spectrum of CB<sub>1</sub>-sC18 after purification. UV-chromatogram was recorded using a linear gradient from 10–60% ACN in water (incl. 0.1% TFA) over 15 min.

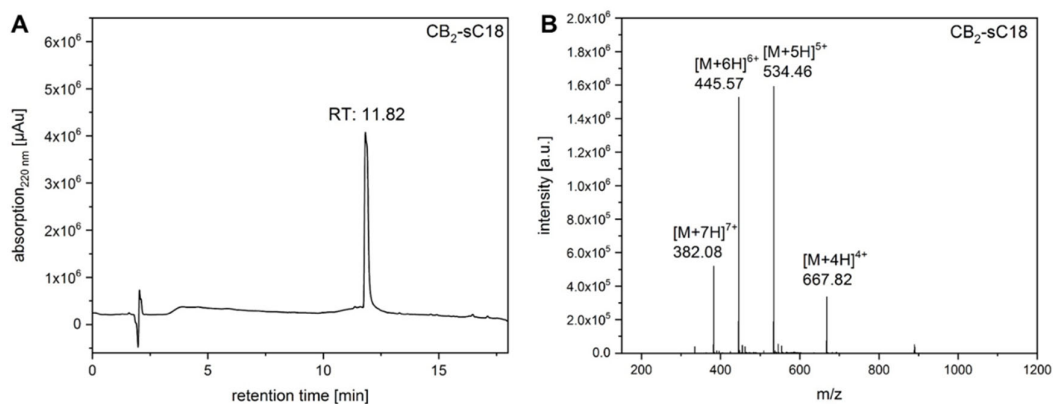

**Figure S3.** (A) UV-chromatogram and (B) corresponding ESI-MS spectrum of CB<sub>2</sub>-sC18 after purification. UV-chromatogram was recorded using a linear gradient from 10–60% ACN in water (incl. 0.1% TFA) over 15 min.

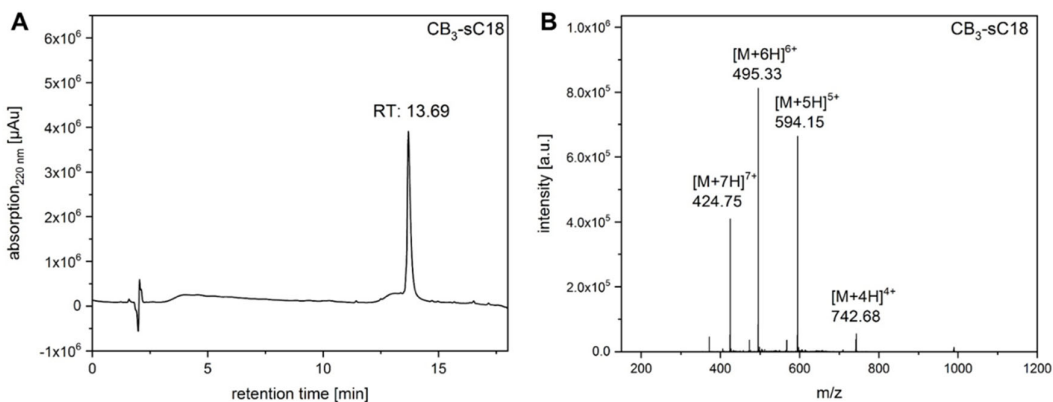

**Figure S4.** (A) UV-chromatogram and (B) corresponding ESI-MS spectrum of CB<sub>3</sub>-sC18 after purification. UV-chromatogram was recorded using a linear gradient from 10–60% ACN in water (incl. 0.1% TFA) over 15 min.

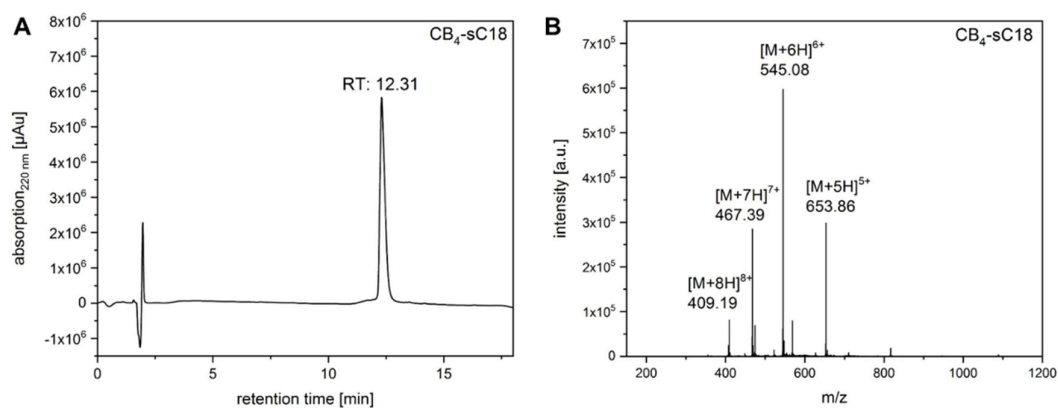

**Figure S5.** (A) UV-chromatogram and (B) corresponding ESI-MS spectrum of  $CB_4$ -sC18 after purification. UV-chromatogram was recorded using a linear gradient from 20–70% ACN in water (incl. 0.1% TFA) over 15 min.

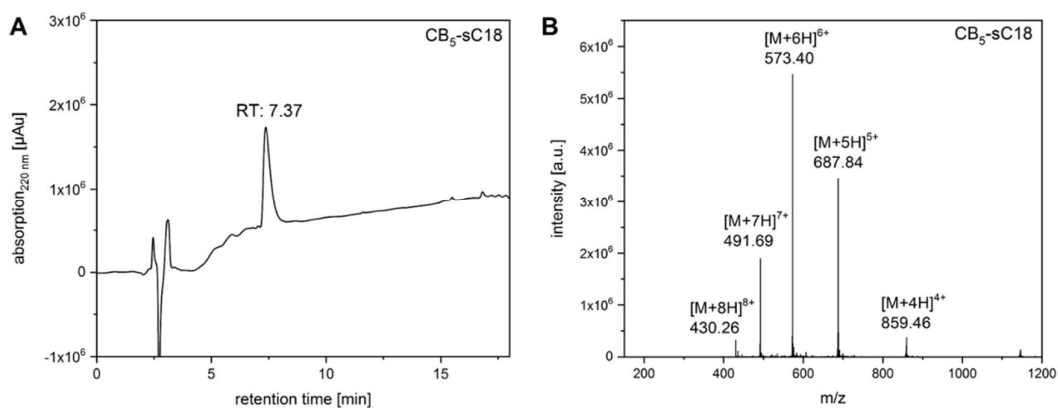

**Figure S6.** (A) UV-chromatogram and (B) corresponding ESI-MS spectrum of  $CB_5$ -sC18 after purification. UV-chromatogram was recorded using a linear gradient from 30–90% ACN in water (incl. 0.1% TFA) over 15 min.

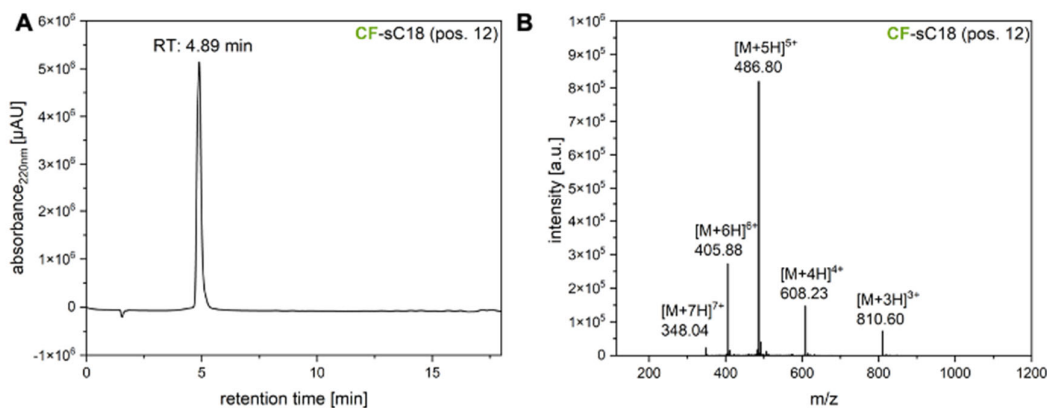

**Figure S7.** (A) UV-chromatogram and (B) corresponding ESI-MS spectrum of CF-sC18 (pos. 12) after purification. UV-chromatogram was recorded using a linear gradient from 20–80% ACN in water (incl. 0.1% TFA) over 15 min.

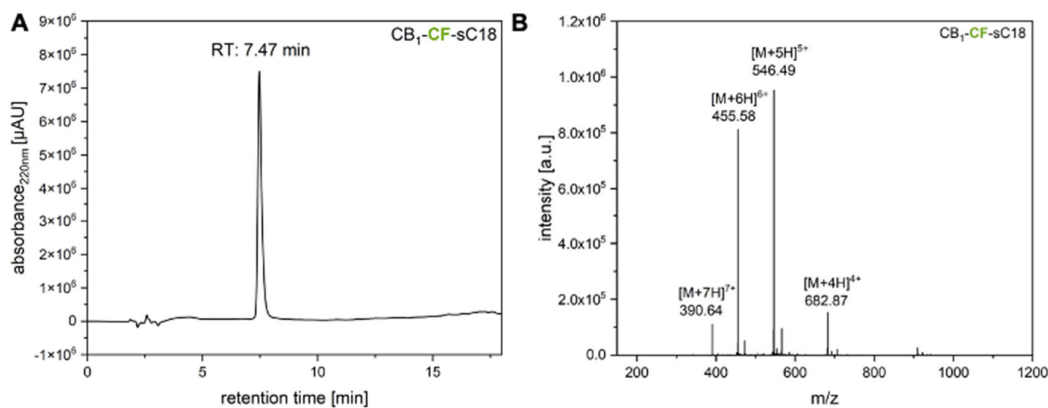

**Figure S8.** (A) UV-chromatogram and (B) corresponding ESI-MS spectrum of CB<sub>1</sub>-CF-sC18 after purification. UV-chromatogram was recorded using a linear gradient from 20–80% ACN in water (incl. 0.1% TFA) over 15 min.

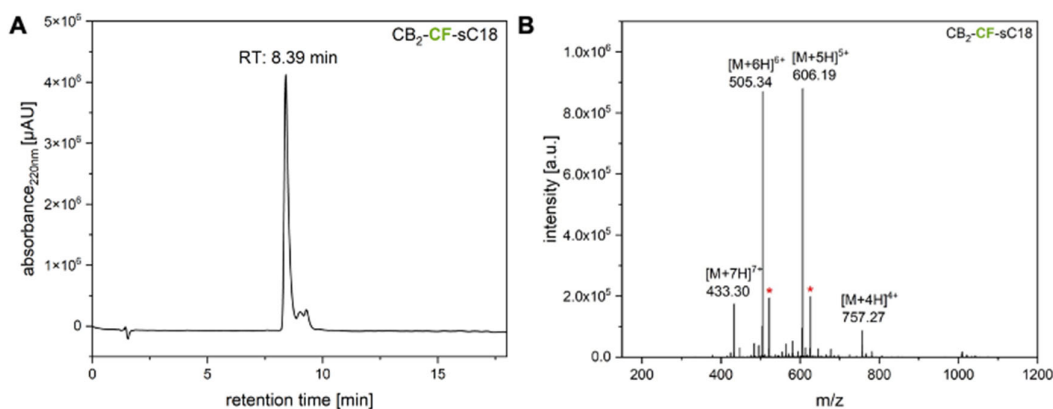

**Figure S9.** (A) UV-chromatogram and (B) corresponding ESI-MS spectrum of CB<sub>2</sub>-CF-sC18 after purification. UV-chromatogram was recorded using a linear gradient from 20–80% ACN in water (incl. 0.1% TFA) over 15 min. Red stars indicate TFA-adducts, which appear in the UV-chromatogram as a shoulder.

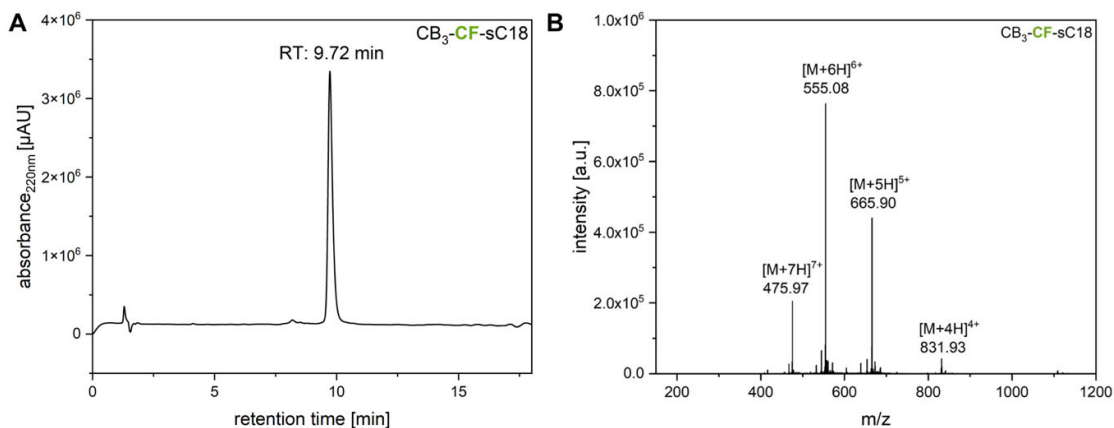

**Figure S10.** (A) UV-chromatogram and (B) corresponding ESI-MS spectrum of CB<sub>3</sub>-CF-sC18 after purification. UV-chromatogram was recorded using a linear gradient from 20–80% ACN in water (incl. 0.1% TFA) over 15 min.

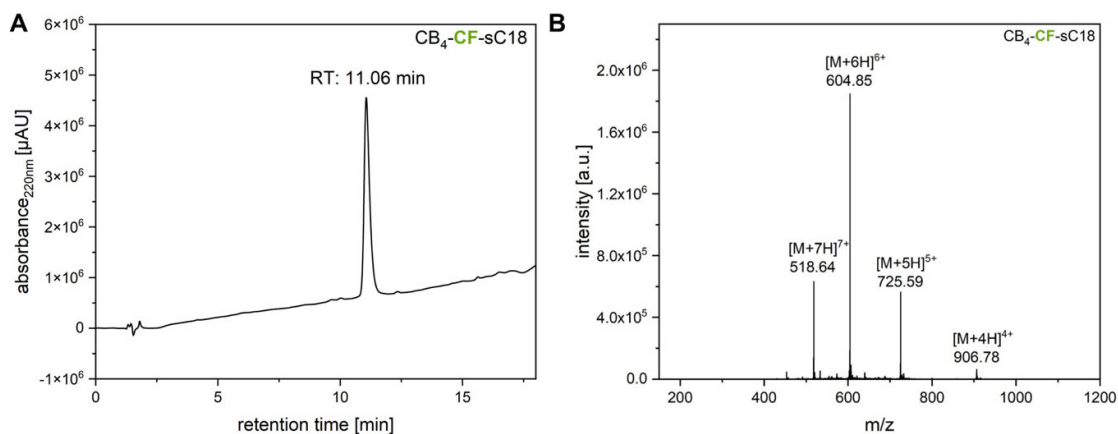

**Figure S11.** (A) UV-chromatogram and (B) corresponding ESI-MS spectrum of  $\text{CB}_4\text{-CF-sC18}$  after purification. UV-chromatogram was recorded using a linear gradient from 20–80% ACN in water (incl. 0.1% TFA) over 15 min.

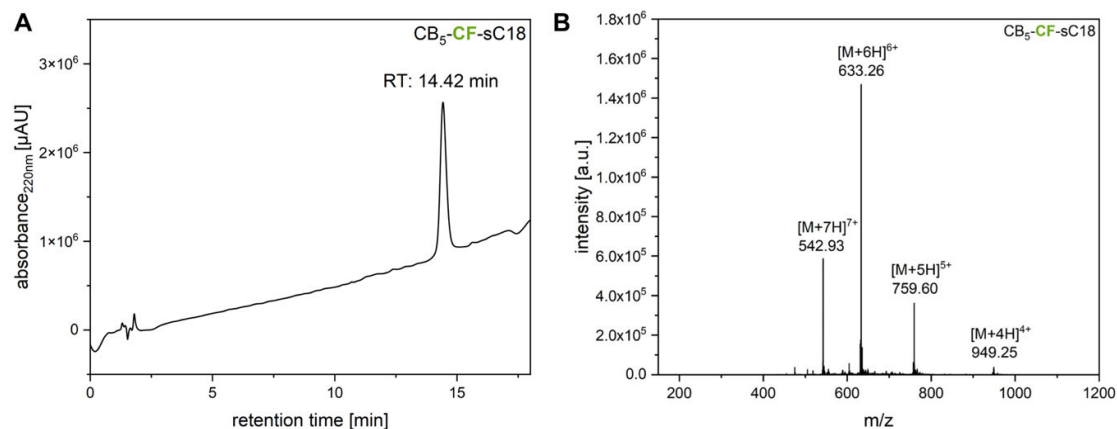

**Figure S12.** (A) UV-chromatogram and (B) corresponding ESI-MS spectrum of  $\text{CB}_5\text{-CF-sC18}$  after purification. UV-chromatogram was recorded using a linear gradient from 20–80% ACN in water (incl. 0.1% TFA) over 15 min.

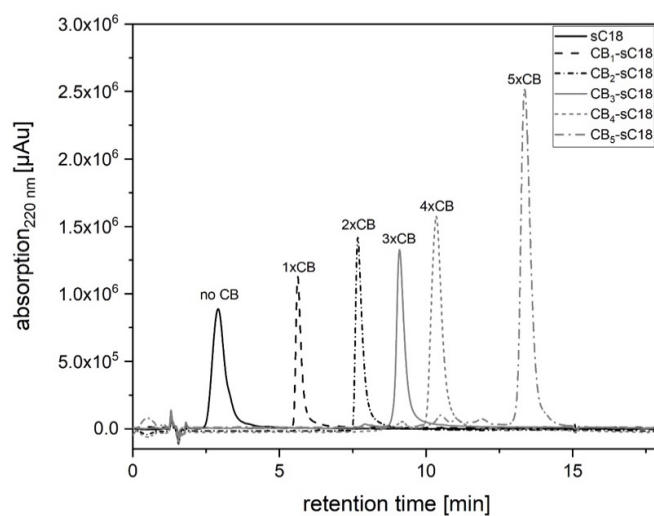

**Figure S13.** UV-chromatograms of all conjugates recorded using a linear gradient from 20–80% ACN in water (incl. 0.1% TFA) within 15 min. Retention times: sC18: 2.91 min;  $\text{CB}_1\text{-sC18}$ : 5.63 min;  $\text{CB}_2\text{-sC18}$ : 7.67 min;  $\text{CB}_3\text{-sC18}$ : 9.10 min;  $\text{CB}_4\text{-sC18}$ : 10.35 min;  $\text{CB}_5\text{-sC18}$ : 13.36 min.

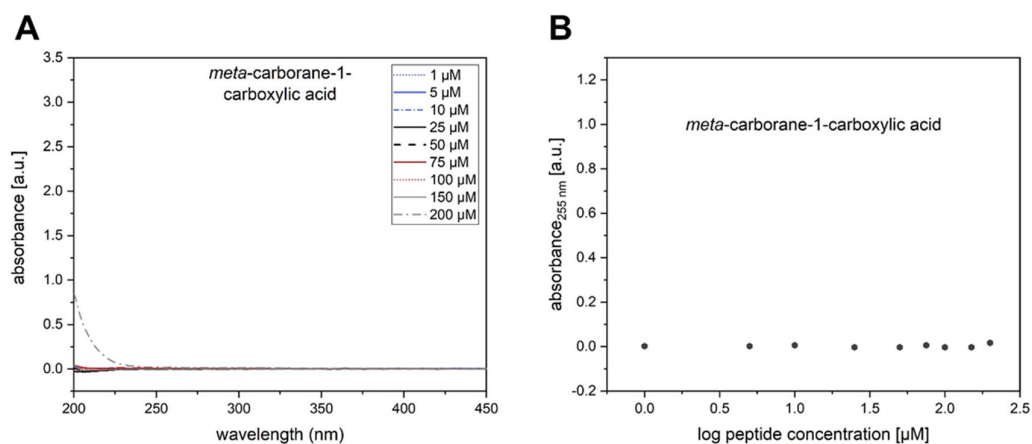

**Figure S14.** Determination of critical micelle concentration (CMC) of *meta*-carboranyl-carboxylic acid. (A) UV-VIS spectrum from 200–450 nm of *meta*-carboranyl-carboxylic acid at various concentrations (1–200  $\mu\text{M}$ ). (B) Absorbance at 255 nm plotted against the logarithm of peptide concentration.

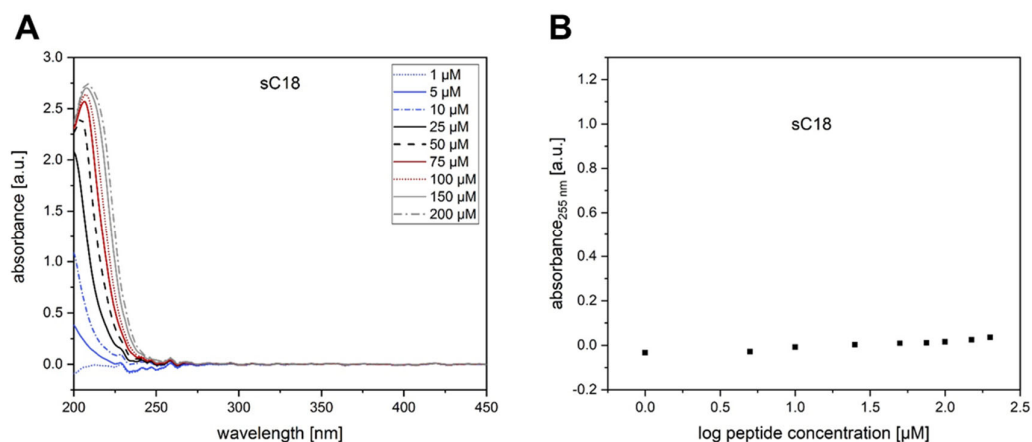

**Figure S15.** Determination of critical micelle concentration (CMC) of sC18. (A) UV-VIS spectrum from 200–450 nm of sC18 at various concentrations (1–200  $\mu\text{M}$ ). (B) Absorbance at 255 nm plotted against the logarithm of peptide concentration.

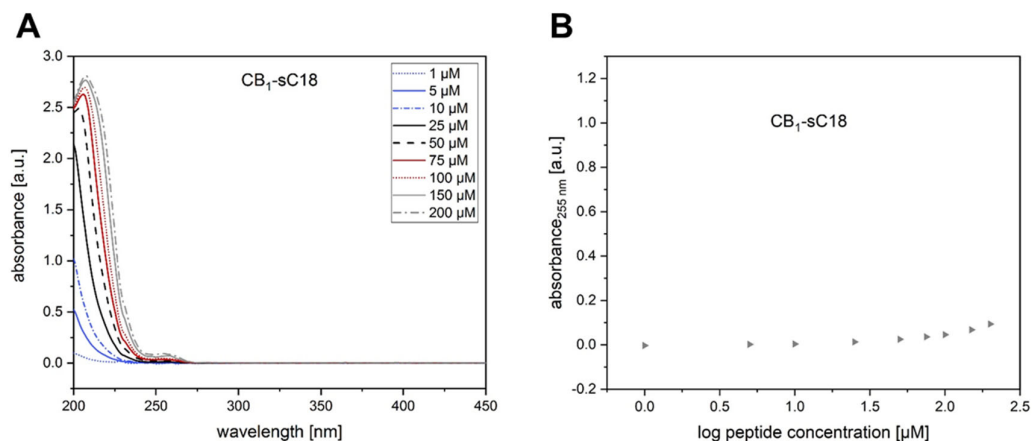

**Figure S16.** Determination of critical micelle concentration (CMC) of CB<sub>1</sub>-sC18. (A) UV-VIS spectrum from 200–450 nm of CB<sub>1</sub>-sC18 at various concentrations (1–200  $\mu\text{M}$ ). (B) Absorbance at 255 nm plotted against the logarithm of peptide concentration.

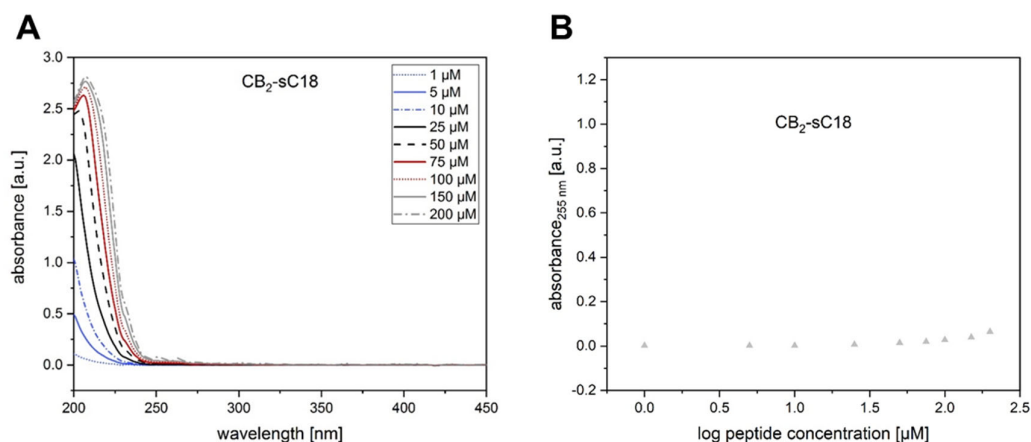

**Figure S17.** Determination of critical micelle concentration (CMC) of CB<sub>2</sub>-sC18. (A) UV-VIS spectrum from 200–450 nm of CB<sub>2</sub>-sC18 at various concentrations (1–200 μM). (B) Absorbance at 255 nm plotted against the logarithm of peptide concentration.

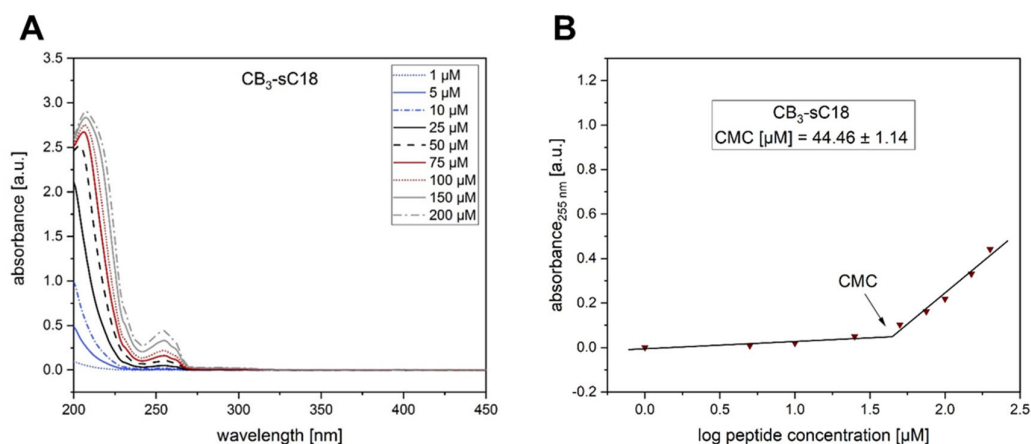

**Figure S18.** Determination of critical micelle concentration (CMC) of CB<sub>3</sub>-sC18. (A) UV-VIS spectrum from 200–450 nm of CB<sub>3</sub>-sC18 at various concentrations (1–200 μM). (B) Absorbance at 255 nm plotted against the logarithm of peptide concentration. The intersection point indicates the CMC.

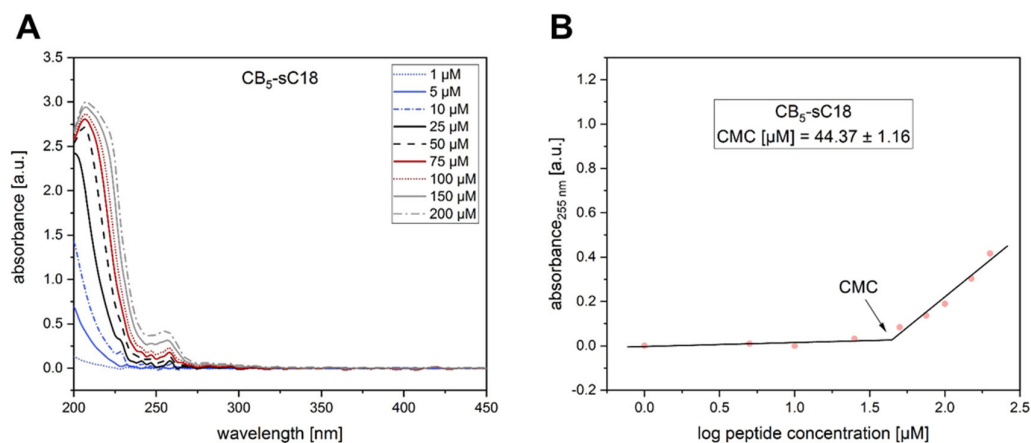

**Figure S19.** Determination of critical micelle concentration (CMC) of CB<sub>5</sub>-sC18. (A) UV-VIS spectrum from 200–450 nm of CB<sub>5</sub>-sC18 at various concentrations (1–200 μM). (B) Absorbance at 255 nm plotted against the logarithm of peptide concentration. The intersection point indicates the CMC.





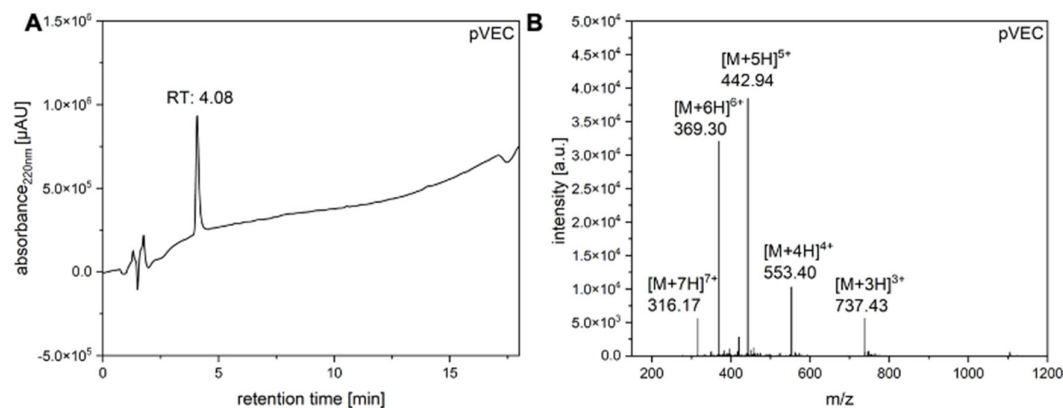

**Figure S22.** (A) UV-chromatogram and (B) corresponding ESI-MS spectrum of pVEC after purification. UV-chromatogram was recorded using a linear gradient from 20–80% ACN in water (incl. 0.1% TFA) over 15 min.

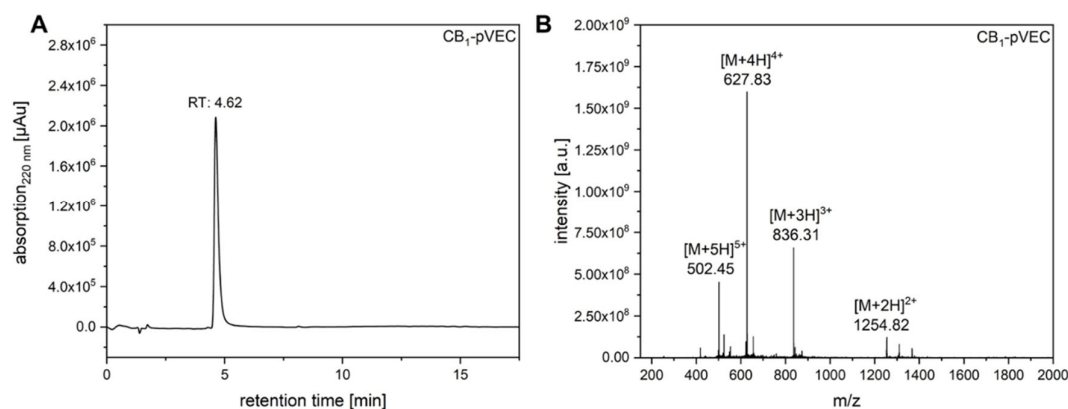

**Figure S23.** (A) UV-chromatogram and (B) corresponding ESI-MS spectrum of CB<sub>1</sub>-pVEC after purification. UV-chromatogram was recorded using a linear gradient from 20–80% ACN in water (incl. 0.1% TFA) over 15 min.

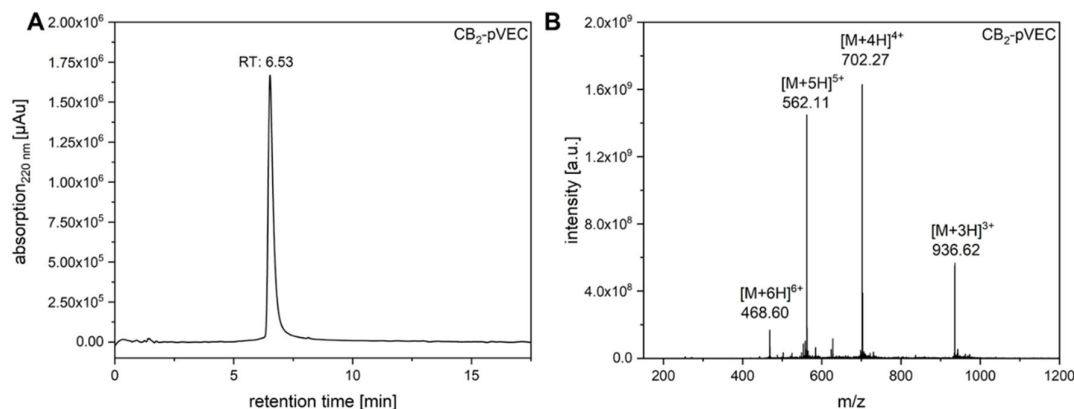

**Figure S24.** (A) UV-chromatogram and (B) corresponding ESI-MS spectrum of CB<sub>2</sub>-pVEC after purification. UV-chromatogram was recorded using a linear gradient from 20–80% ACN in water (incl. 0.1% TFA) over 15 min.

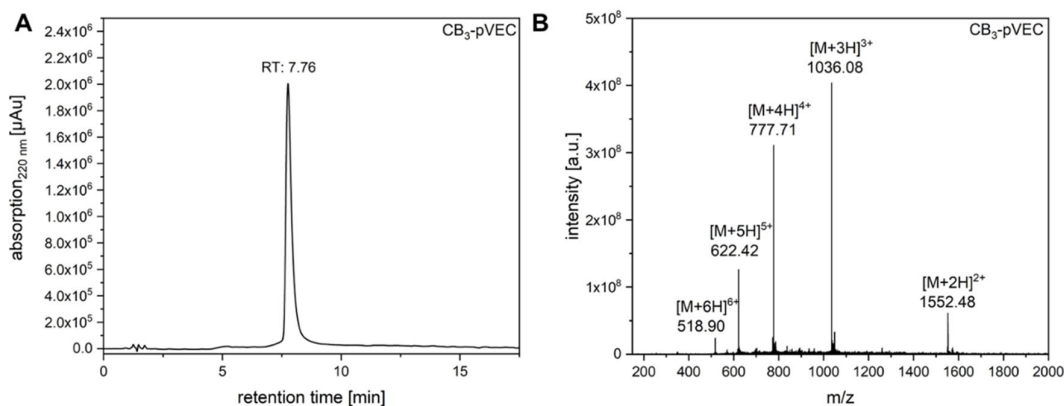

**Figure S25.** (A) UV-chromatogram and (B) corresponding ESI-MS spectrum of CB<sub>3</sub>-pVEC after purification. UV-chromatogram was recorded using a linear gradient from 20–80% ACN in water (incl. 0.1% TFA) over 15 min.

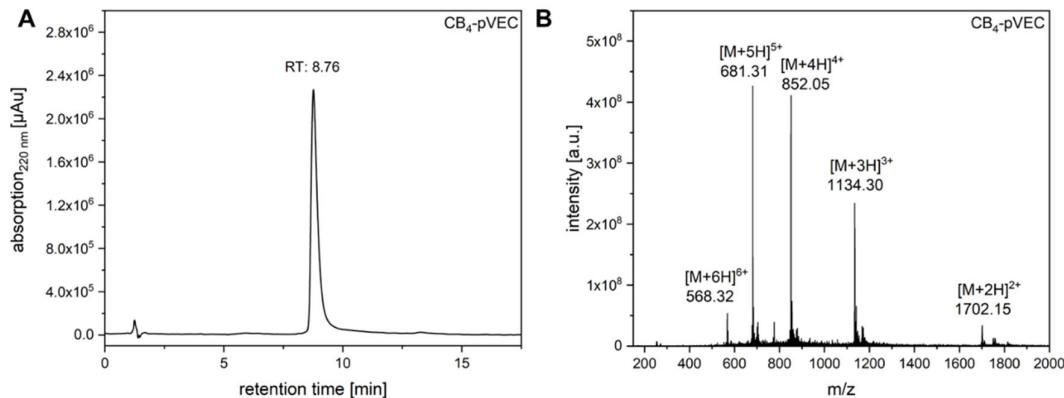

**Figure S26.** (A) UV-chromatogram and (B) corresponding ESI-MS spectrum of CB<sub>4</sub>-pVEC after purification. UV-chromatogram was recorded using a linear gradient from 20–80% ACN in water (incl. 0.1% TFA) over 15 min.

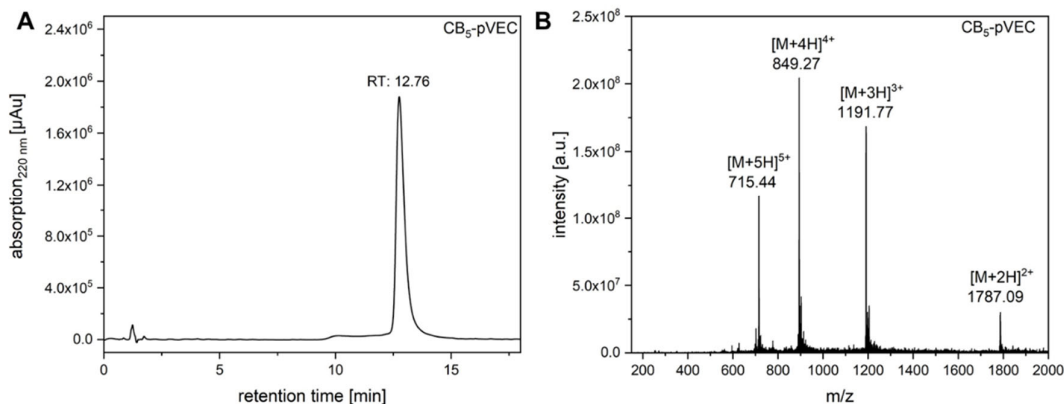

**Figure S27.** (A) UV-chromatogram and (B) corresponding ESI-MS spectrum of CB<sub>5</sub>-pVEC after purification. UV-chromatogram was recorded using a linear gradient from 20–80% ACN in water (incl. 0.1% TFA) over 15 min.

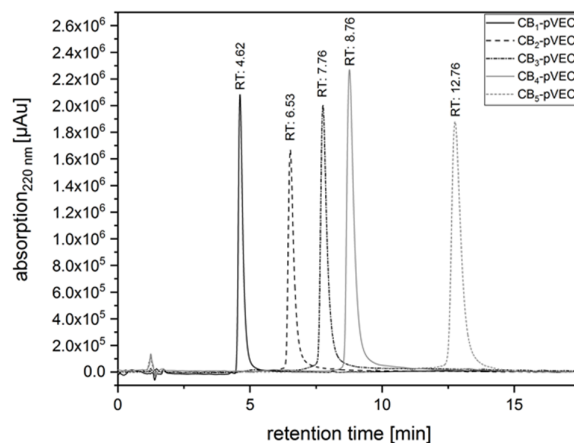

**Figure S28.** UV-chromatogram overlay of CB-pVEC conjugates. UV-chromatogram was recorded using a linear gradient from 20–80% ACN in water (incl. 0.1% TFA) over 15 min.

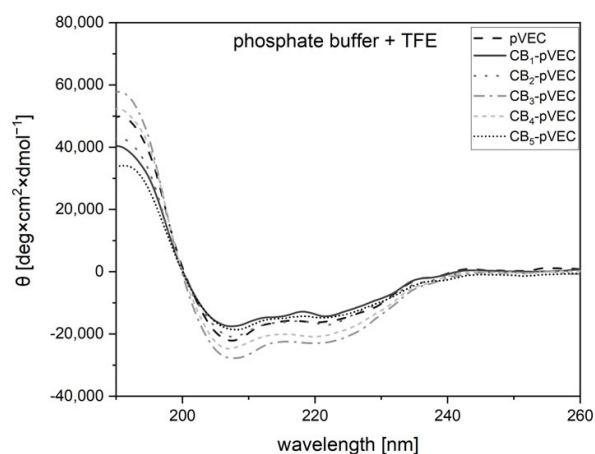

**Figure S29.** CD spectra of CB-pVEC conjugates (20  $\mu\text{M}$  peptide concentration) in 10 mM phosphate buffer (pH 7.0) with the addition of 50% TFE.

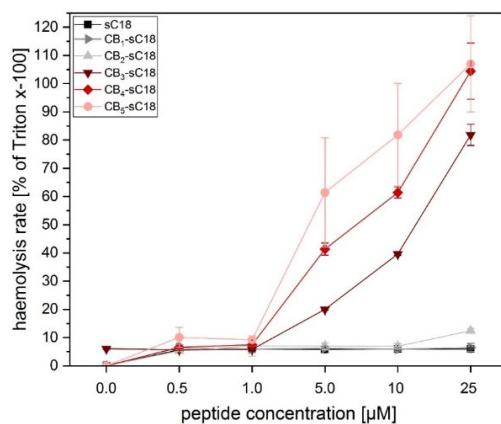

**Figure S30.** Hemolytic activity of carborane-peptide conjugates towards human red blood cells (RBCs). RBCs were treated with different peptide concentrations (0.5–25  $\mu\text{M}$ ) for 1 h. RBCs treated with Triton X-100 served as control. Data were normalized to control. Experiments were conducted in triplicate with  $n = 2$ . Error bars represent standard deviation.

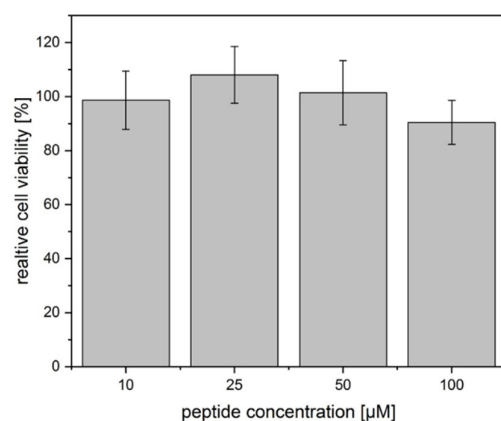

**Figure S31.** Cytotoxicity profile of *meta*-1-carborane-carboxylic acid towards HeLa cells. Compound was incubated for 24 h at different concentrations (10–100 μM) with HeLa cells. Data were normalized to untreated cells (100% viability). Cells treated with 70% ethanol served as positive control. Experiments were performed in triplicate with  $n = 2$ . Error bars represent standard deviation.

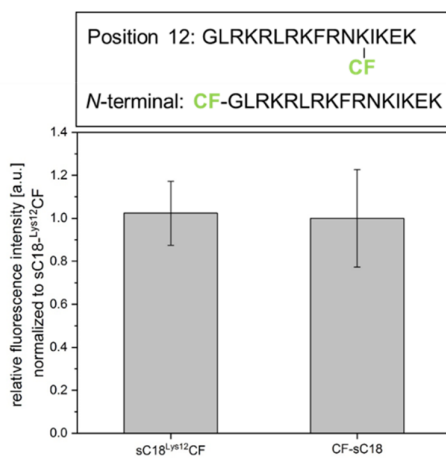

**Figure S32.** Cellular uptake of sC18 into HeLa cells via flow cytometry. The fluorophore 5(6)-Carboxyfluorescein was either attached at the *N*-terminus or position 12 of sC18. Peptides were incubated for 30 min. Experiments were conducted in triplicate with  $n = 3$ . Error bars represent standard deviation.

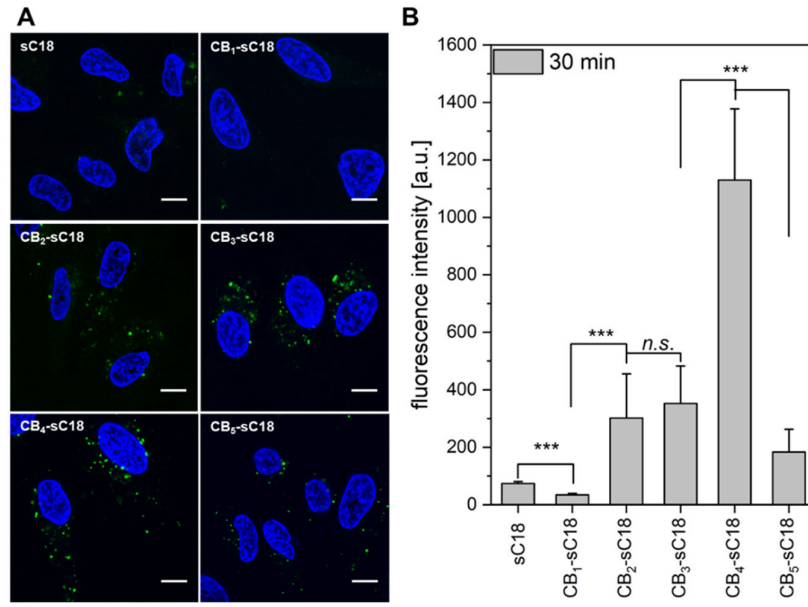

**Figure S33.** Internalization of CB-sC18 conjugates after 30 min. (A) Confocal laser scanning microscopic analysis of 1  $\mu$ M CF-labeled peptide conjugates after 30 min incubation time; green: 5(6)-Carboxyfluorescein-labeled peptide conjugates; blue: Hoechst 33342 nuclear stain; scale bar: 10  $\mu$ m. (B) Corresponding flow cytometry analysis of 1  $\mu$ M CF-labeled peptide conjugates for 30 min. Experiments were conducted in triplicate with  $n = 3$ . Error bars represent standard deviation. Significances were determined by Student's t-test (\*\*\*)  $p < 0.0005$ ). CB<sub>4</sub>-sC18 is significant (\*\*\*)  $p < 0.0005$ ) to all conjugates.

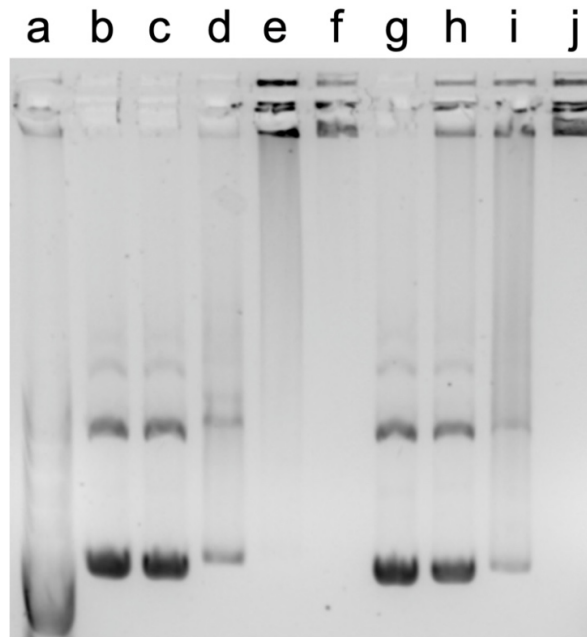

**Figure S34.** Electrophoretic mobility shift assay (EMSA). mCherry plasmid and peptides CB<sub>1</sub>-sC18/CB<sub>4</sub>-sC18 were incubated at different mass ratios for 1h at 37 °C and analyzed via agarose gel electrophoresis. The agarose gel was run at 100 V for 1.5 h. For the mCherry plasmid a defined amount of 250 ng (1 = 250 ng) was used. Loading of lanes: a: 1kb DNA ladder; b: mCherry plasmid, c: 1:0.25 CB<sub>1</sub>-sC18; d: 1:0.5 CB<sub>1</sub>-sC18; e: 1:1 CB<sub>1</sub>-sC18; f: 1:3 CB<sub>1</sub>-sC18; g: 1:0.25 CB<sub>4</sub>-sC18; h: 1:0.5 CB<sub>4</sub>-sC18; i: 1:1 CB<sub>4</sub>-sC18; j: 1:3 CB<sub>4</sub>-sC18.

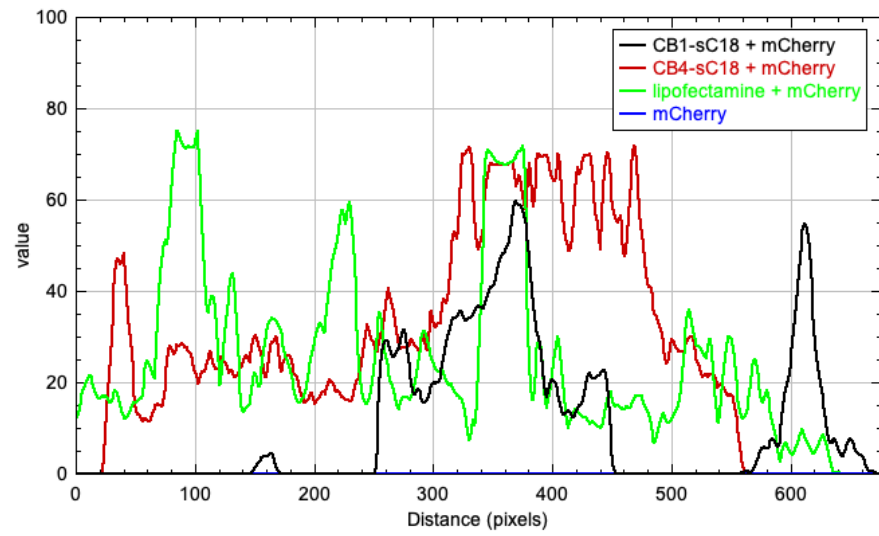

**Figure S35.** Overlay of intensity profiles. Shown are the intensity profiles as overlay of CB<sub>1</sub>-sC18 + mCherry (black), CB<sub>4</sub>-sC18 + mCherry (red), lipofectamine + mCherry (green) and mCherry plasmid alone (blue).
